# Supplementary material
Source: Springer Nature journal article supplement (https://www.springermedizin.de/resource/supplementary/12913_2011_1881_MOESM1_ESM.pdf/9529102)

Service quality dimensions

Consumer complaint satisfaction evaluations and trust

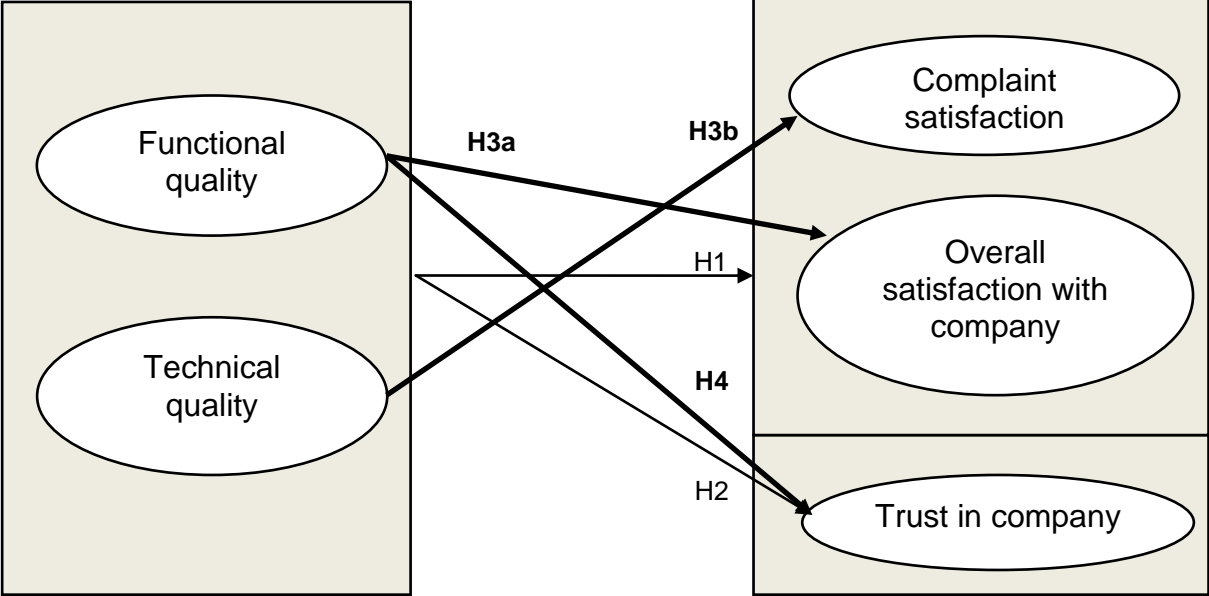

Supplement: MOESM1 [file 9529102]
